# Supplementary material for: One Health Index (OHI) applied to Curitiba, the ninth-largest metropolitan area of Brazil, with concomitant assessment of animal, environmental, and human health indicators
Source: PubMed Central journal article supplement — One Health. 2022 Jan 31;14:100373. doi: 10.1016/j.onehlt.2022.100373 (PMC9171528; doi:10.1016/j.onehlt.2022.100373), 2022-01-31

# MAPA DE USO E COBERTURA DA TERRA DO ESTADO DO PARANÁ

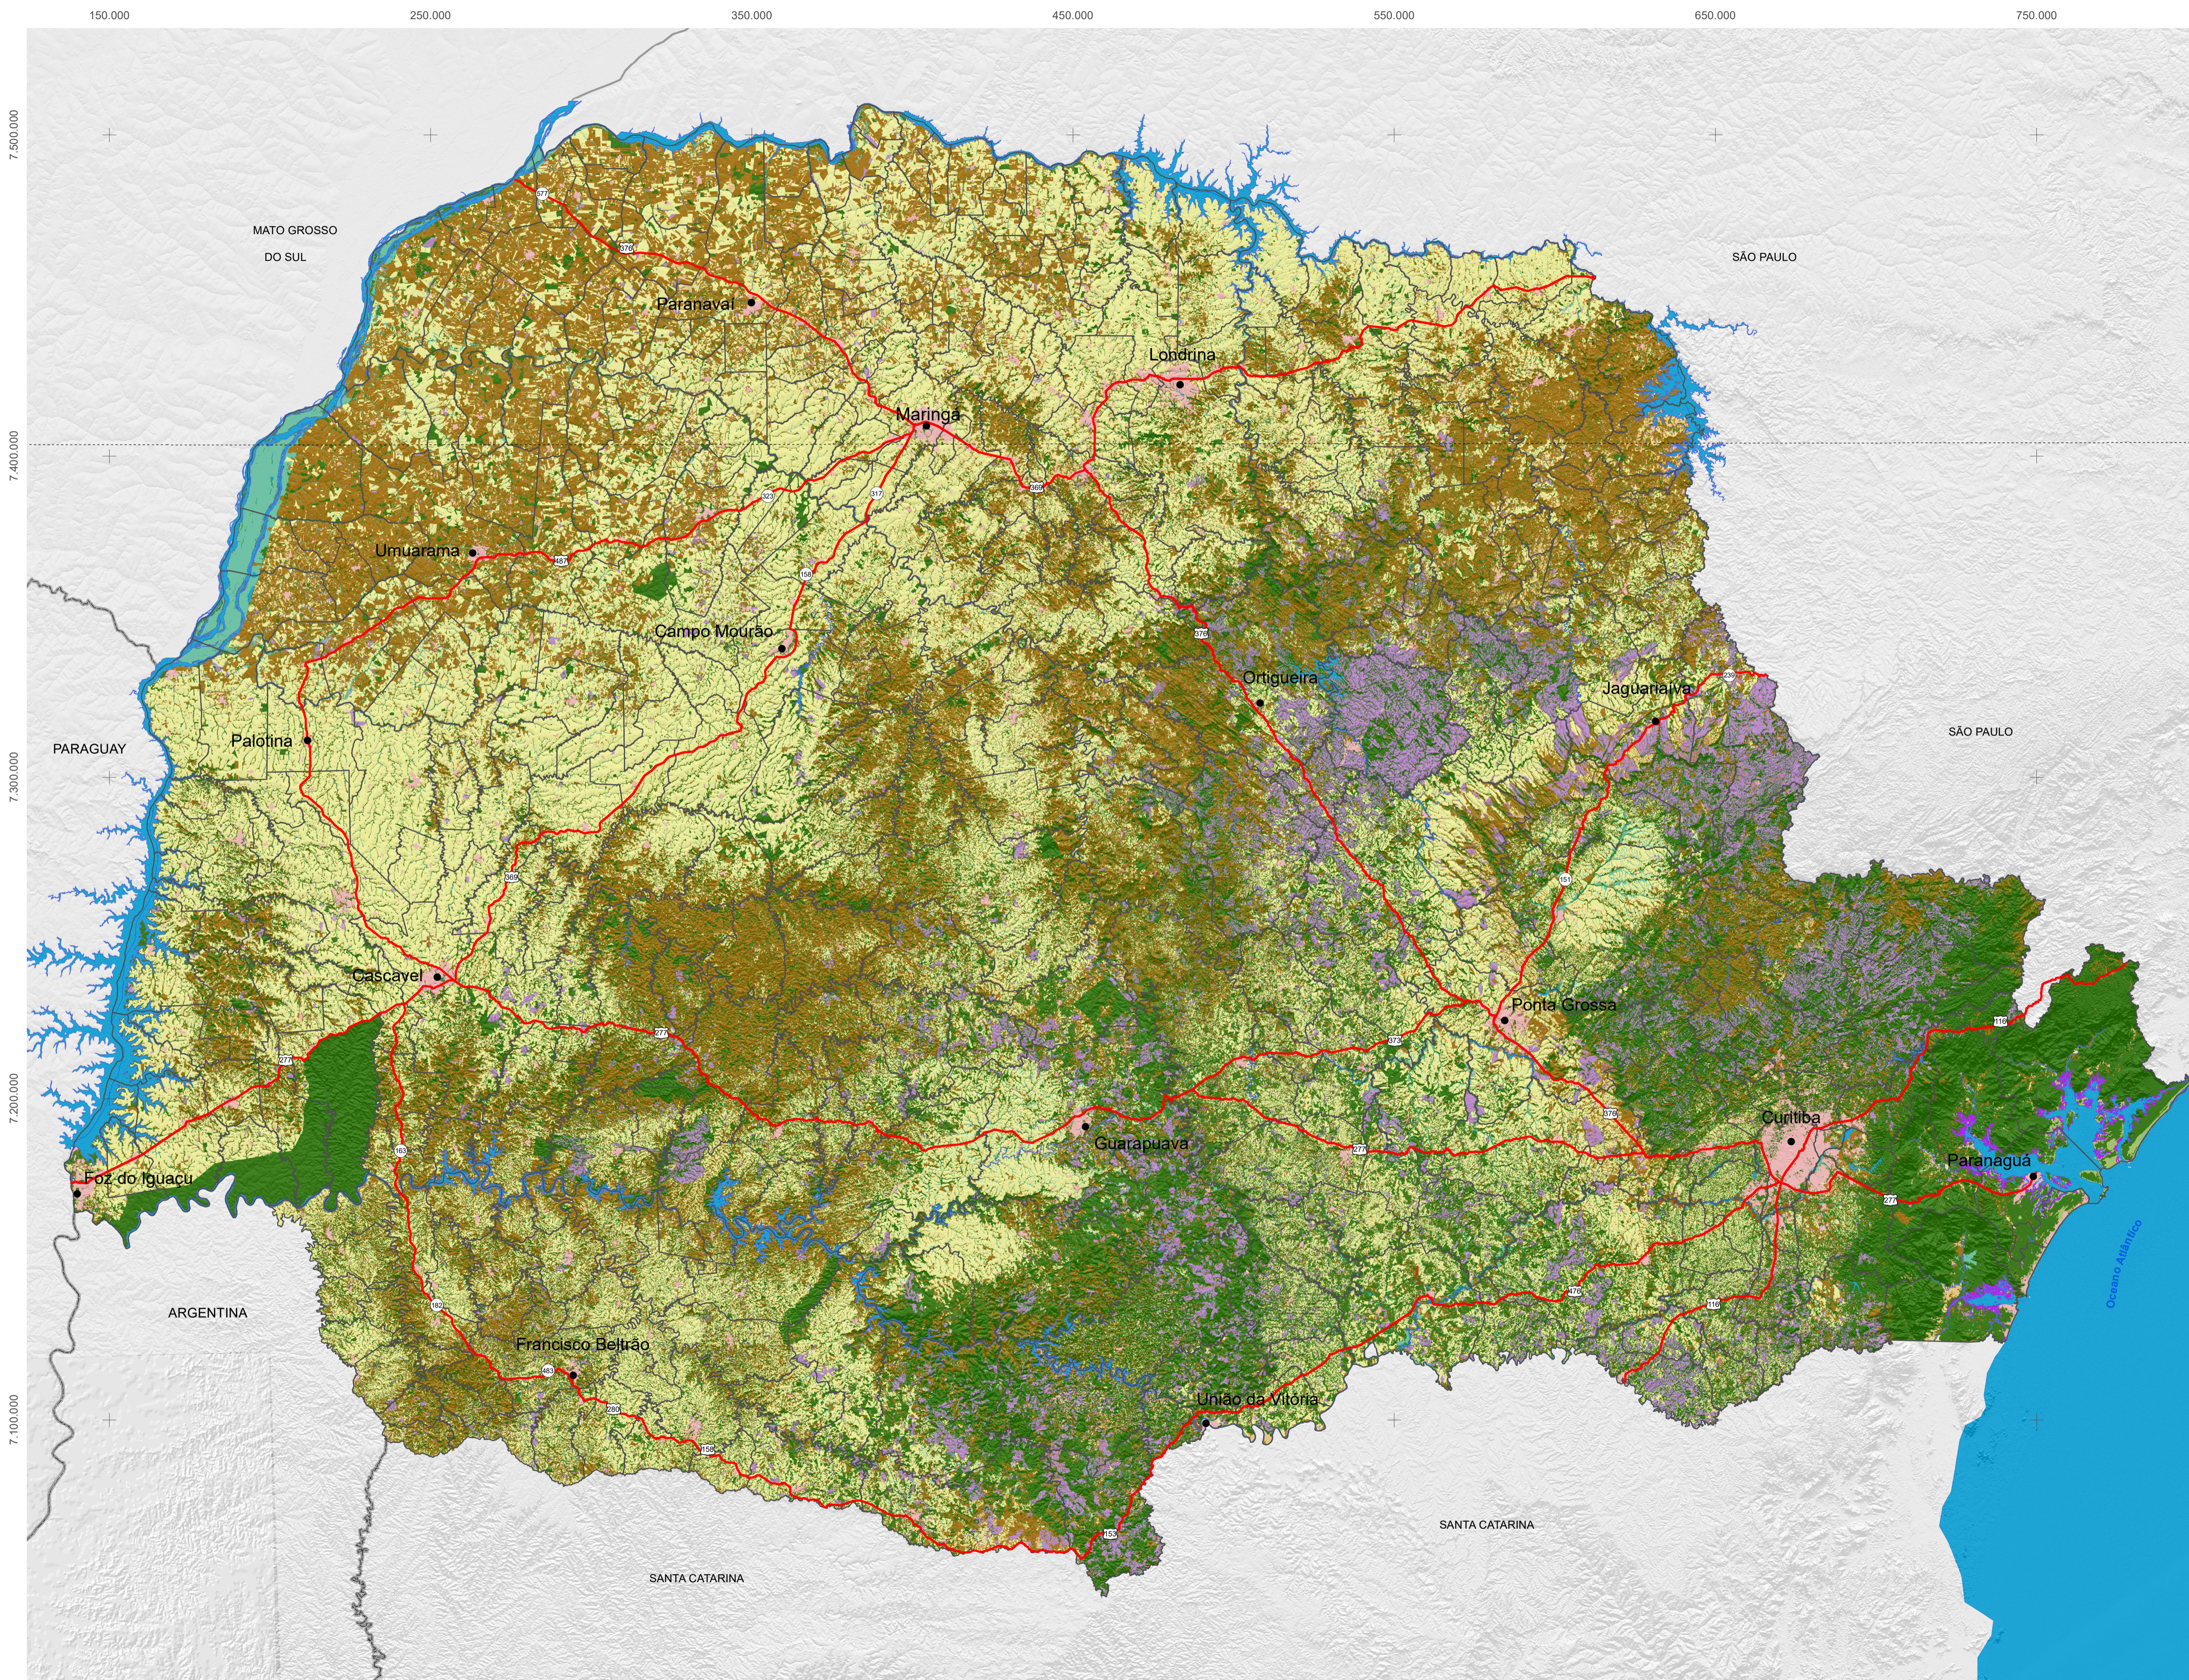

## Legenda

-  Hidrografia
-  Massa d'água
-  Limites municipais
-  Sedes Municipais
-  Rodovia Estadual
-  Rodovia Federal
-  Trópico de Capricórnio
-  Rodovias
-  Divisa Internacional
-  Divisa Estadual

## Classes de mapeamento - NIVEL II

-  33,01% Agricultura Anual
-  0,68% Agricultura Perene
-  2,06% Corpos d'Água
-  29,12% Floresta Nativa
-  0,003% Linha de Praia
-  0,16% Mangue
-  25,32% Pastagem/Campo
-  6,47% Plantios Florestais
-  0,09% Restinga
-  0,06% Solo Exposto/Mineração
-  1,35% Várzea
-  0,24% Área Construída
-  1,45% Área Urbanizada

## INFORMAÇÕES CARTOGRÁFICAS

Projeção Universal Transversa de Mercator - UTM  
Meridiano Central 51°  
Datum SIRGAS 2000

ESCALA  
1:1.000.000

## FONTES

Uso e Cobertura da Terra - IAT - publicação 2020  
- Contratação Governo do Paraná / SEPL / ITCG  
- Financiamento Banco Mundial  
- Elaboração Consórcio Araucária - Senografia e Geopixel  
- Insumo ortomagens COPEL Worldview e Pleiades  
- Resolução 2 metros / 2012-2016  
- Área de mapeamento - 1 ha

Divisas Municipais - ITCG - 2019  
Hidrografia - ÁGUASPARANÁ - 2011  
Sistema de Transporte - DSG-IBGE - 1985 a 2000  
Modelo Digital de Elevação (MDE): TOPODATA, 2010

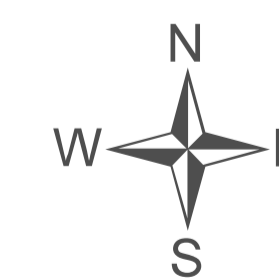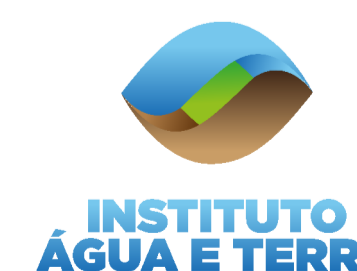

Supplement: mmc1.pdf [file mmc1.pdf]
